# Supplementary material for: Developing a scoring tool to estimate the risk of deterioration for normotensive patients with acute pulmonary embolism on admission&nbsp;
Source: Research Square preprint supplement (doi:10.21203/rs.3.rs-50644/v2), 2020-11-25
Supplement: Supplementary file 1 [file 1f9a901ce5bb2fd3daddca62.docx]

**upplement table 2 Bova score**

| Parameter | Scores |
| --- | --- |
| c-Tn I＞0.05ng/L | 2 |
| RV dysfunction | 2 |
| Heart rate≥110beats/min | 1 |
| systolic pressure(90-100mmHg) | 2 |
| Low risk：0-2 scores；  Intermediate-low risk：3-4 scores；  Intermediate-high risk:> 4scores； | |

c-Tn I, Cardiac troponin I
